# Supplementary material for: Stereotactic body radiation therapy for prostate cancer: systematic review and meta-analysis of prospective trials
Source: PubMed Central journal article supplement (PMC6771455; doi:10.18632/oncotarget.27177), 2019-09-24
Supplement: oncotarget-10-5660-s001.pdf [file oncotarget-10-5660-s001.pdf]

# Stereotactic body radiation therapy for prostate cancer: systematic review and meta-analysis of prospective trials

## SUPPLEMENTARY MATERIALS

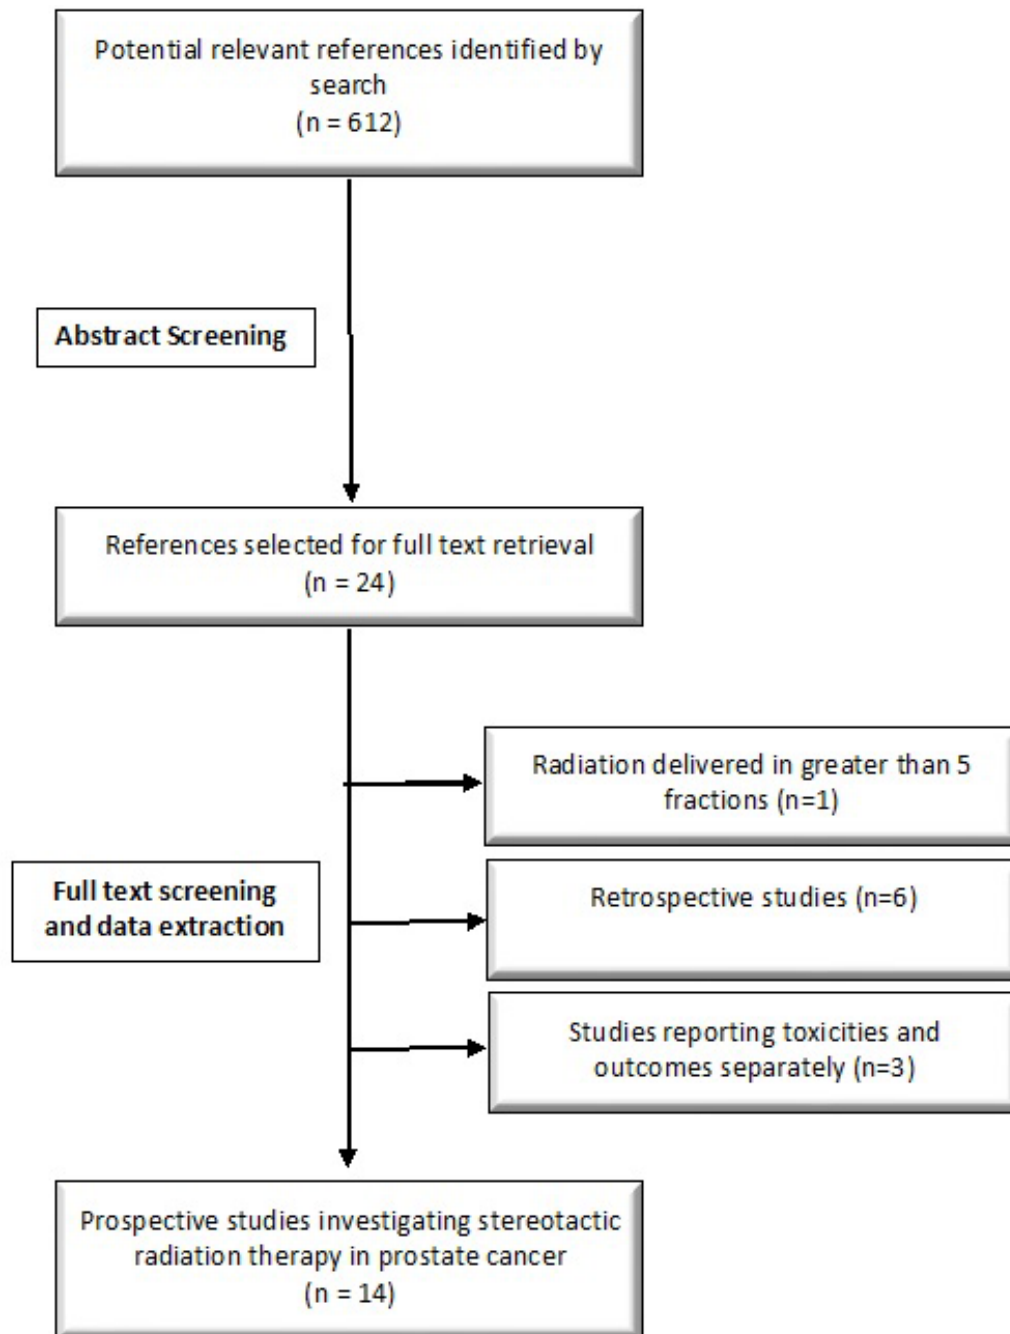

Supplementary Figure 1: Study selection diagram.
